# Supplementary material for: The Study of the Sterilization of the Indoor Air in Hospital/Clinic Rooms by Using the Electron Wind Generator
Source: MDPI journal article supplement (doi:10.3390/ijerph16244935), 2019-12-05
Supplement: s1 [file s1]

a)

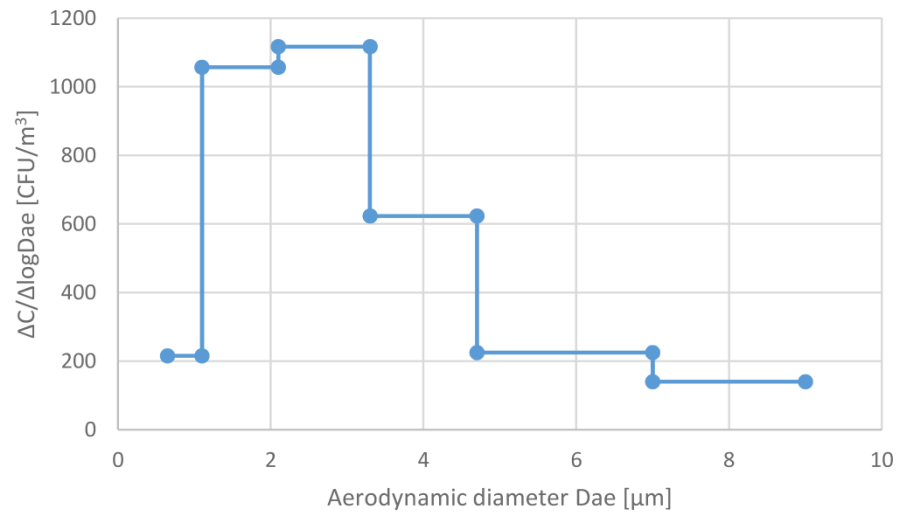

b)

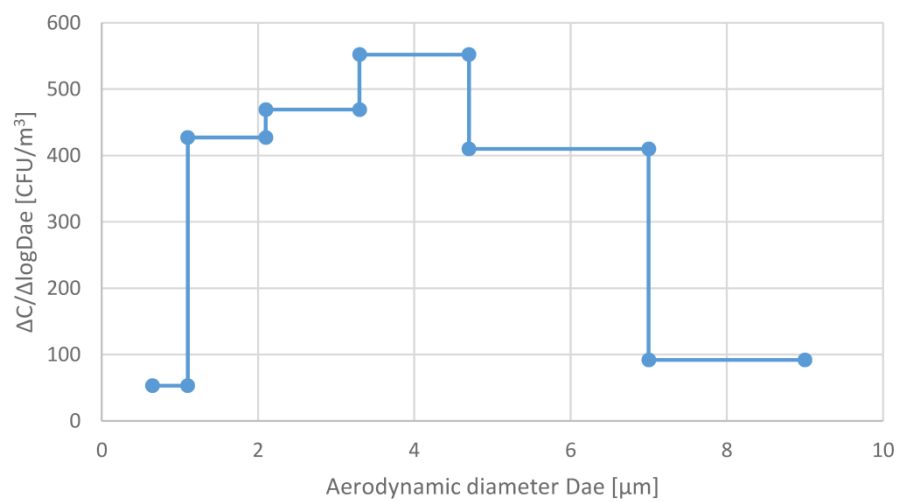

**Figure S1.** Size-distribution of airborne bacteria in the patient's room (PR<sub>i</sub>) at the University Hospital in Zabrze: a) Background, b) 4 hours after start of sterilization using the EWG device.

a)

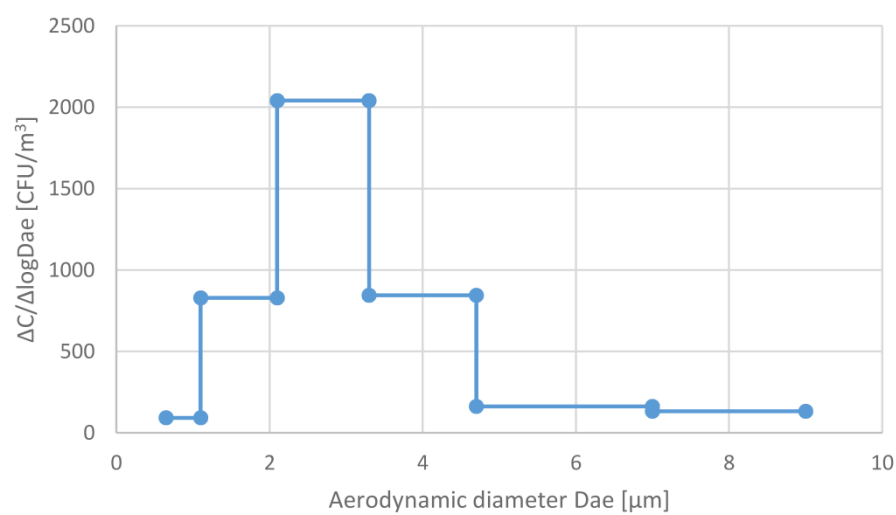

b)

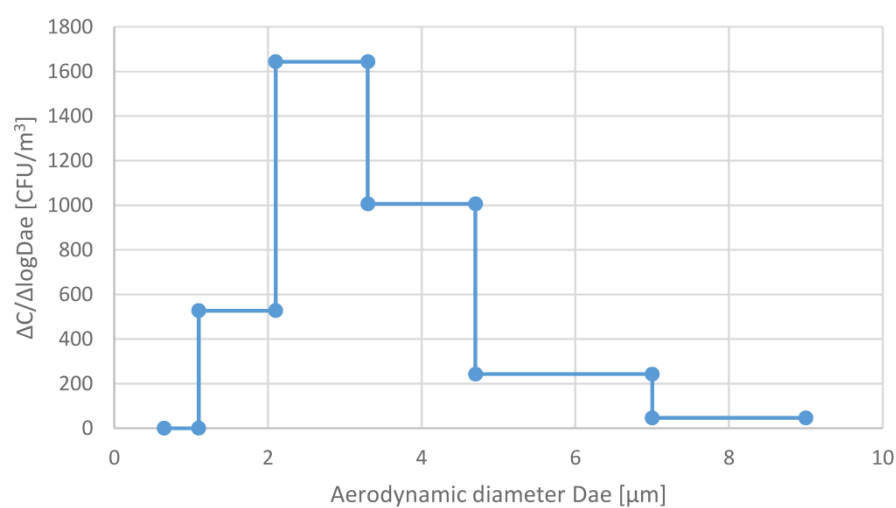

**Figure S2.** Size-distribution of airborne fungi in the patient's room (PR<sub>1</sub>) at the University Hospital in Zabrze: a) Background, b) 4 hours after start of sterilization using the EWG device.

a)

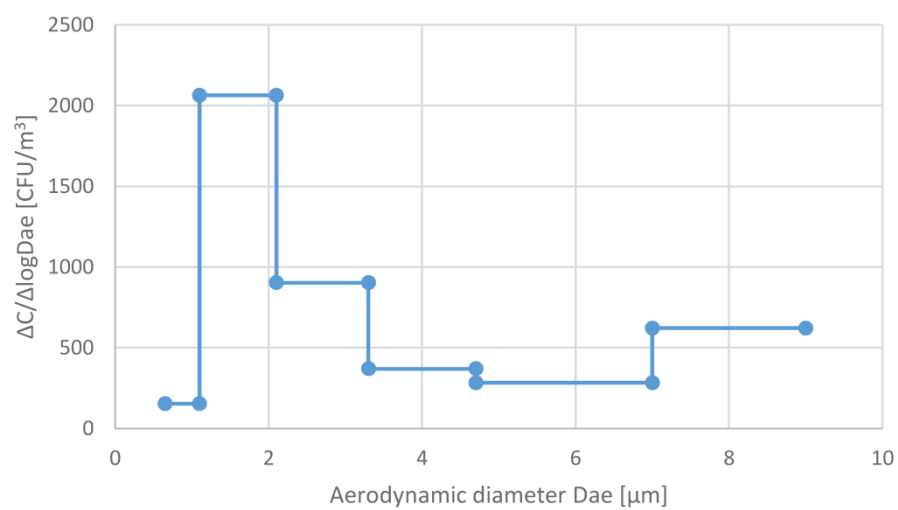

b)

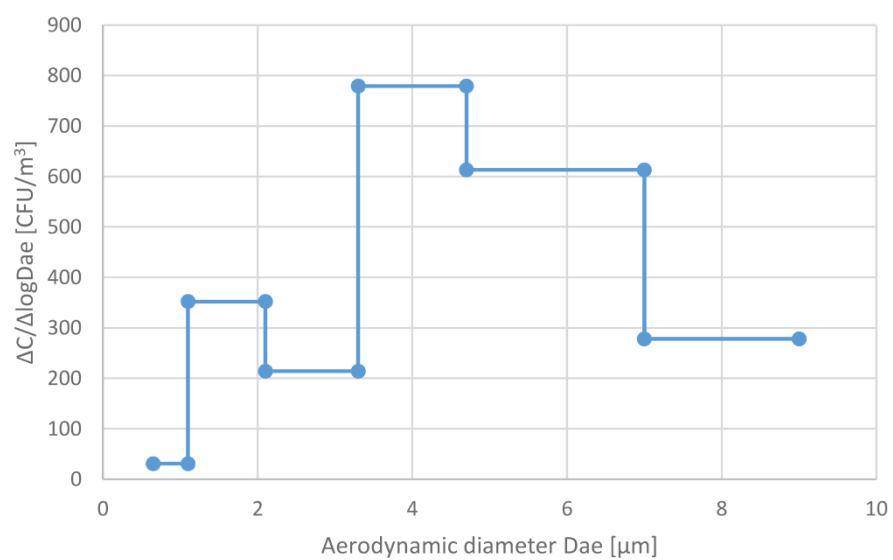

**Figure S3.** Size-distribution of airborne bacteria in the waiting room (WR) at the clinic in Sosnowiec: Background, b) 4 hours after start of sterilization using the EWG device.

a)

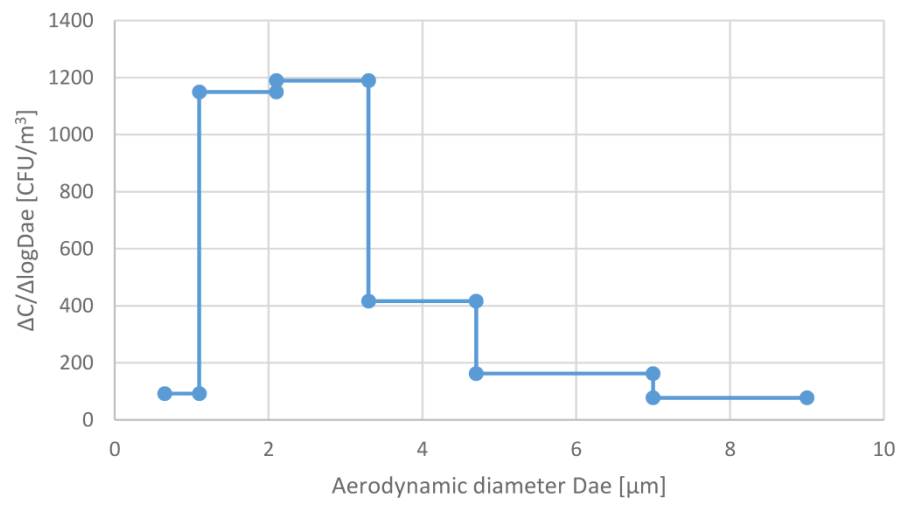

b)

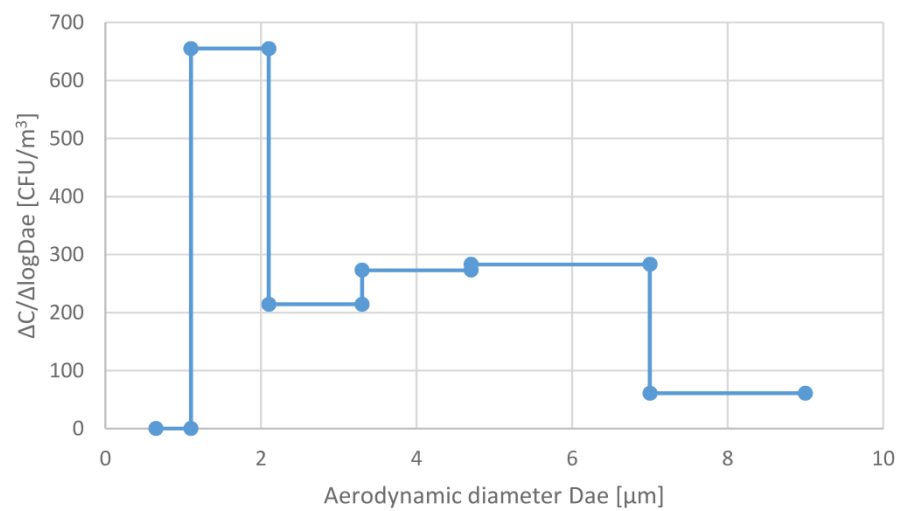

**Figure S4.** Size-distribution of airborne fungi in the waiting room (WR) at the clinic in Sosnowiec: a) Background, b) 4 hours after start of sterilization using the EWG device.
